# Supplementary material for: Anhydrous proton conductivity of electrospun phosphoric acid-doped PVP-PVDF nanofibers and composite membranes containing MOF fillers
Source: Royal Society of Chemistry journal article supplement (doi:10.1039/d1ra04307b), 2021-01-01
Supplement: d1ra04307b1.pdf [file d1ra04307b1.pdf]

**Supporting Information for**

**Anhydrous proton conductivity of electrospun phosphoric  
acid-doped PVP-PVDF nanofibers and composite  
membranes containing MOF fillers**

Lian Sun<sup>a</sup>, Quanchao Gu<sup>a</sup>, Honglei Wang<sup>a</sup>, Jinshan Yu<sup>a</sup>, Xingui Zhou<sup>a\*</sup>

*<sup>a</sup>Science and Technology on Advanced Ceramic Fibers and Composites Laboratory,  
College of Aerospace Science and Engineering, National University of Defense  
Technology, Changsha 410073, China*

**\*Corresponding Author:** E-mail: zhouxinguilmy@163.com (X. G. Zhou)

**Experimental Section**

The sample of membranes for taking TEM image was prepared as the following procedure: first, the electrospun membrane was soaked into the saturated lead acetate (Aladdin, Shanghai, China) water solution overnight. Then the membrane was washed with distilled water for several times and dried under vacuum. For taking TEM images, the as-treated membrane was embedded into epoxy resin in a block template and cured at ~60°C for 24 h. Finally, the blocks were cut into slices (50 ~ 90 nm thickness) and picked up on copper grids.

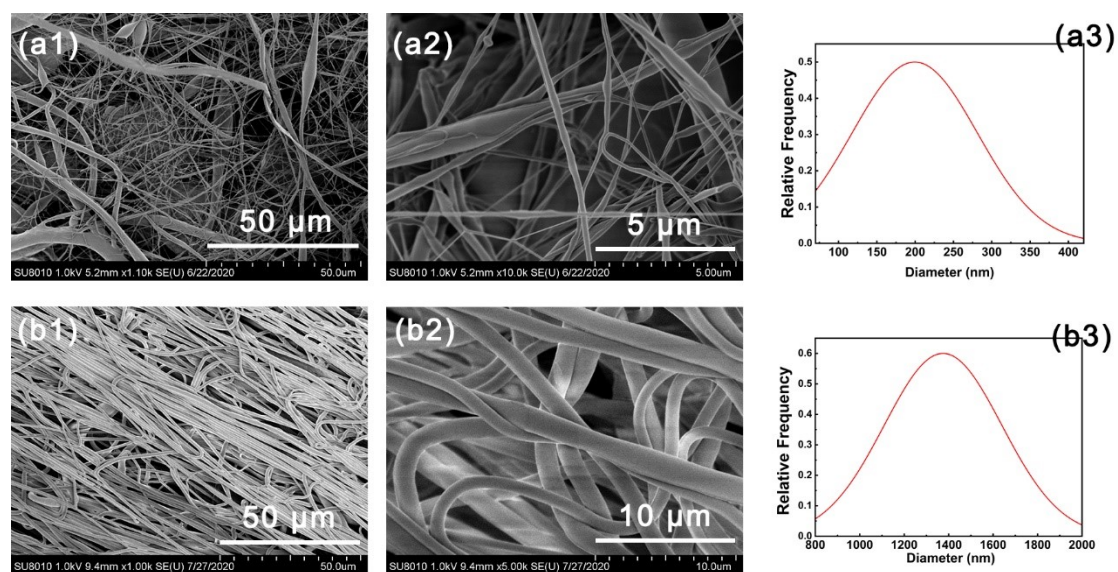

**Figure S1** SEM images and diameter distribution of pristine (a) PVDF and (b) PVP

**Table S1** Viscosity and conductivity of electrospinning solution

| Sample | Solution Viscosity (mPa·S) | Solution Conductivity ( $\mu\text{s cm}^{-1}$ ) |
|--------|----------------------------|-------------------------------------------------|
| PVDF   | 131.5                      | 1.598                                           |
| 20PVP  | 142.4                      | 1.849                                           |
| 40PVP  | 167.1                      | 2.017                                           |
| 60PVP  | 230.3                      | 2.125                                           |
| 80PVP  | 264.5                      | 2.674                                           |
| PVP    | 297.6                      | 2.984                                           |

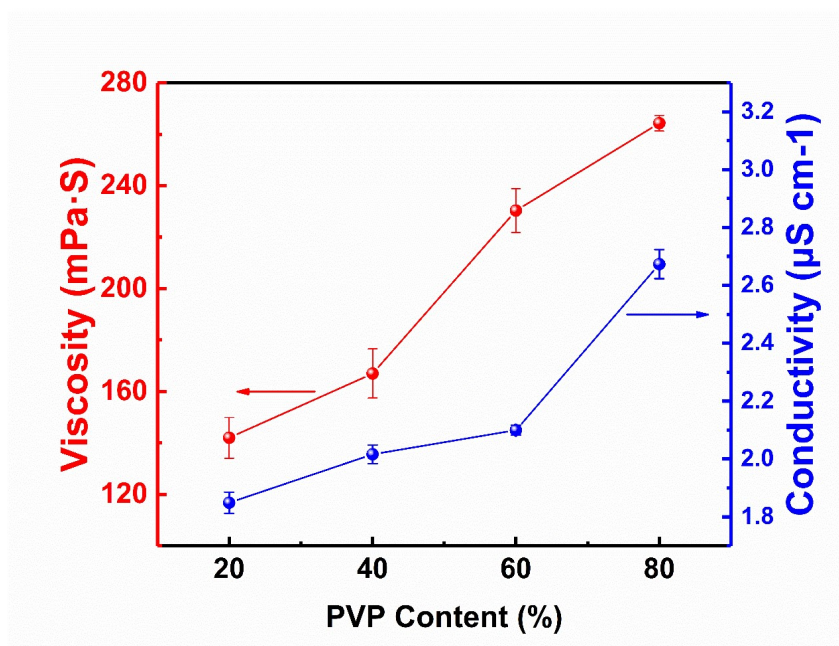

**Figure S2** Relationship between electrospinning solution viscosity/conductivity and PVP content

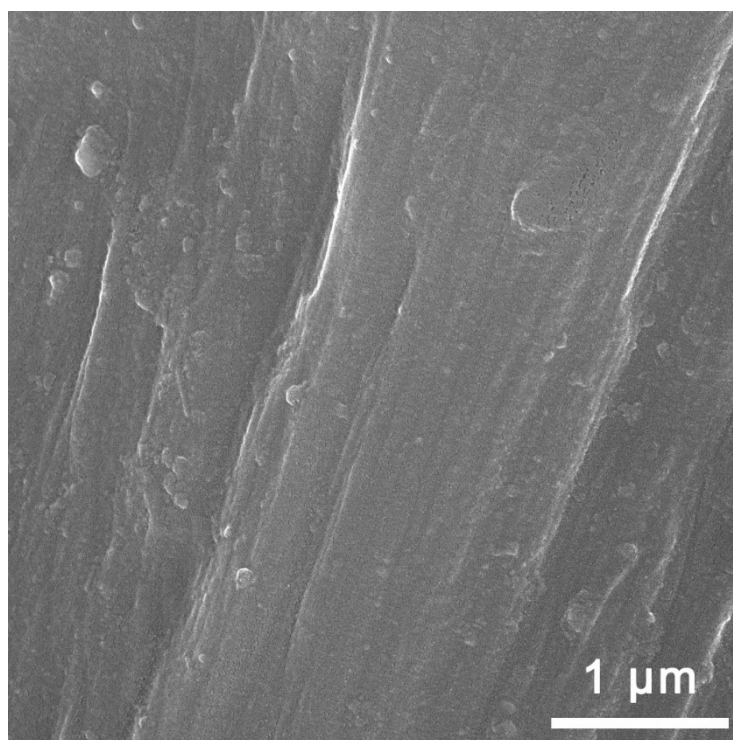

**Figure S3** SEM images of 60PVP nanofiber membranes after hot pressing

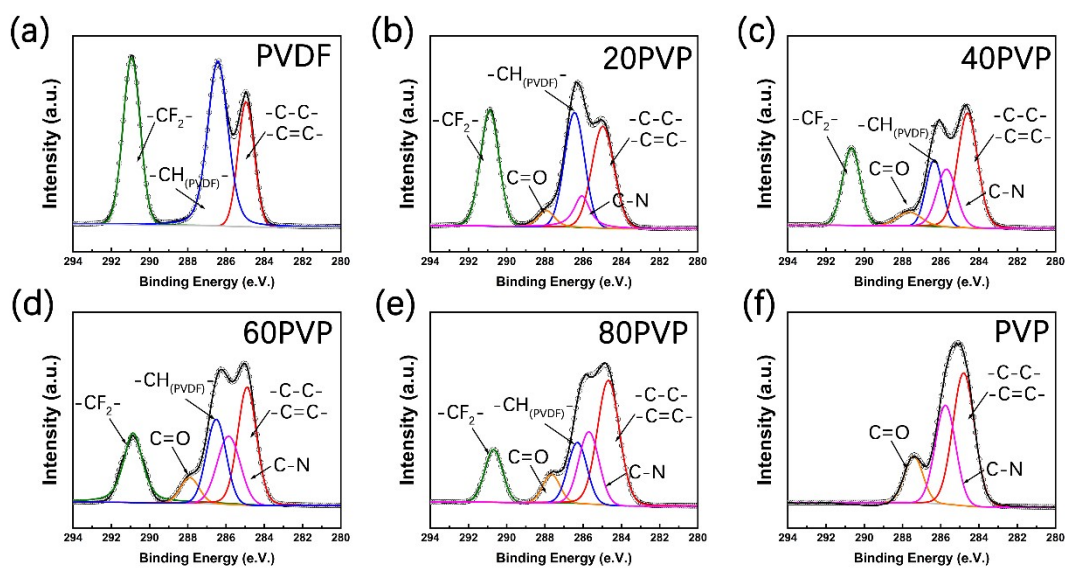

**Figure S4** XPS C 1s spectrum of (a) PVDF, (b) 20PVP, (c) 40PVP, (d) 60PVP, (e) 80PVP and (f) PVP membrane.

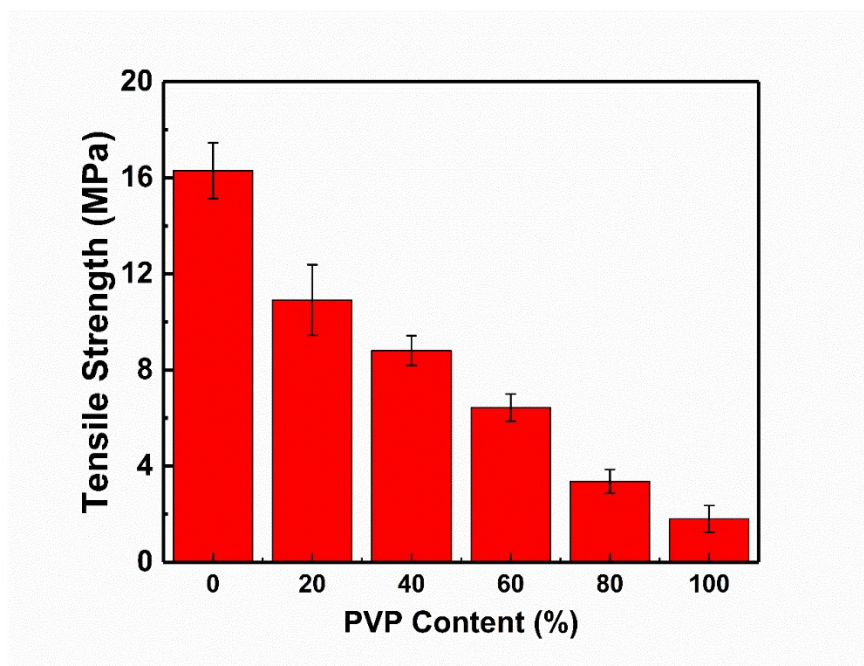

**Figure S5** Mechanical strength of different PVP-PVDF blend nanofiber membranes

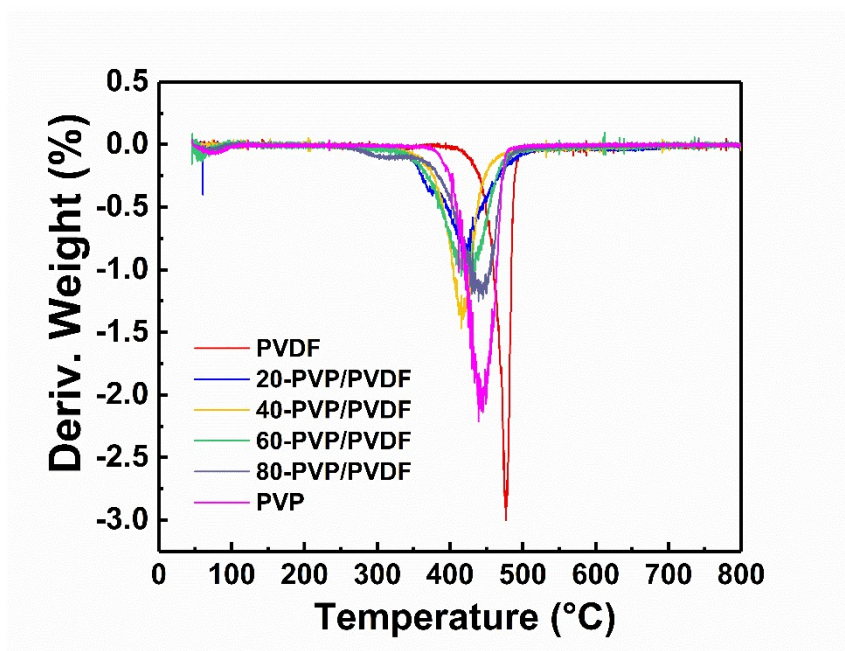

Figure S6 DTG curves of different PVP-PVDF blend nanofiber membranes

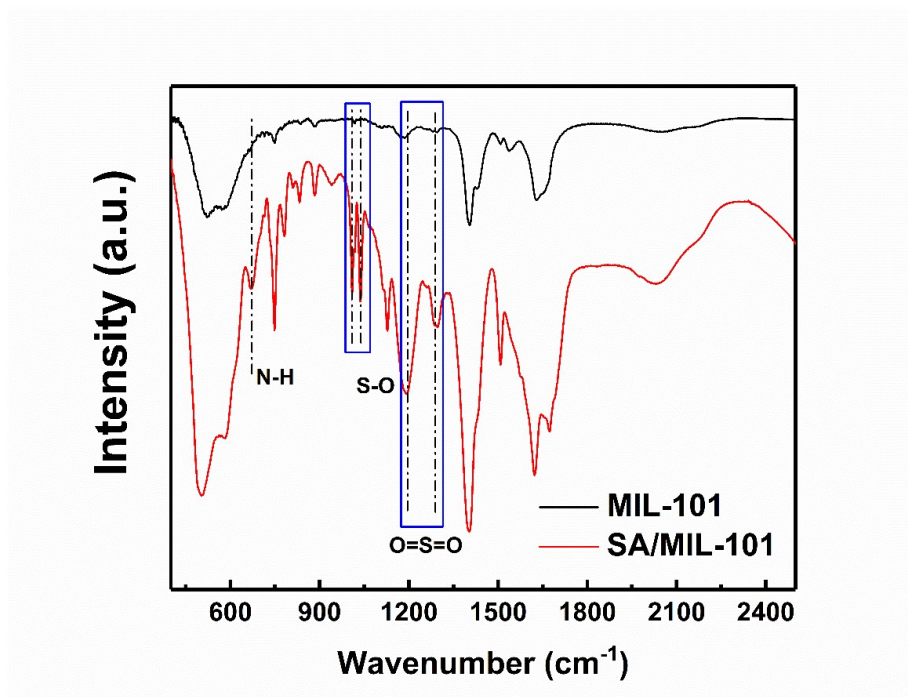

Figure S7 FT-IR spectra of MIL-101 and SA/MIL101

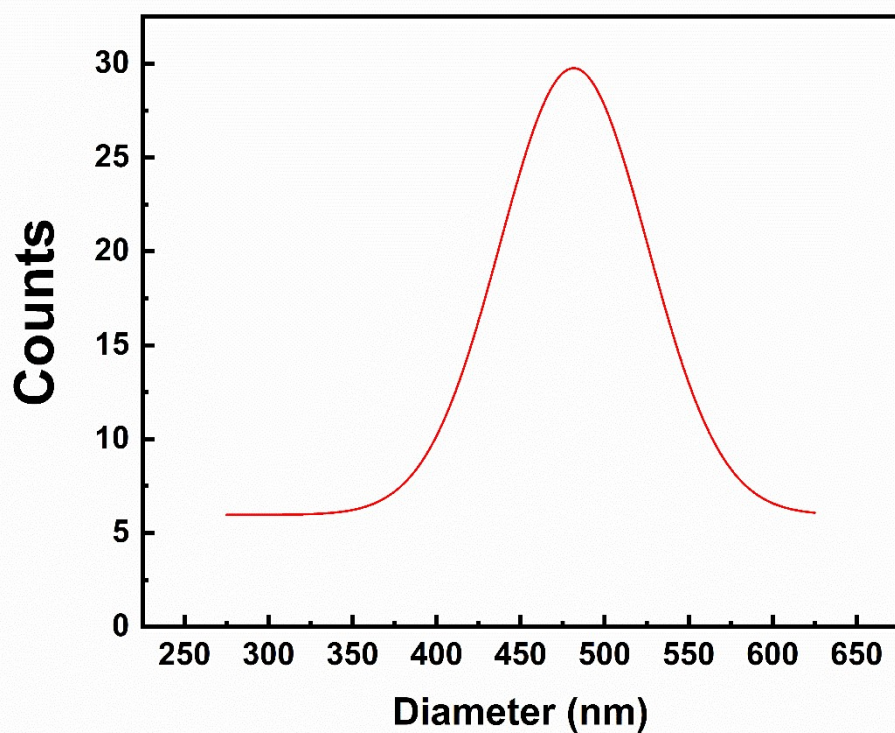

Figure S8 Diameter distribution of SA/MIL101@PVP-PVDF

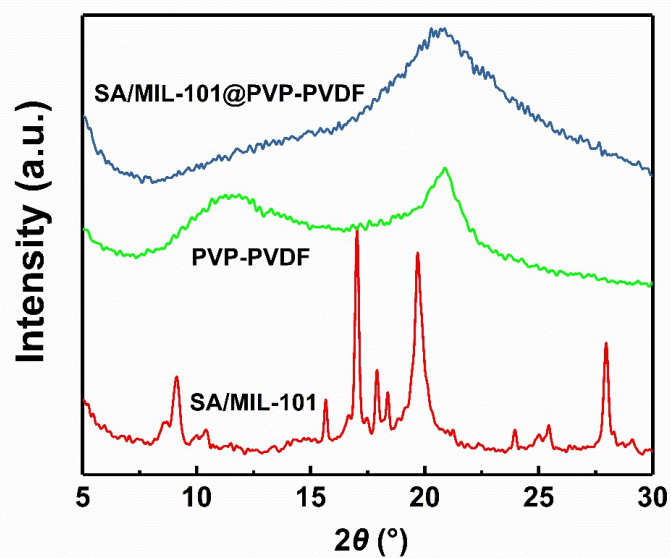

Figure S9 XRD patterns of SA/MIL101 and SA/MIL101@PVP-PVDF compared with PVP-PVDF (60PVP)

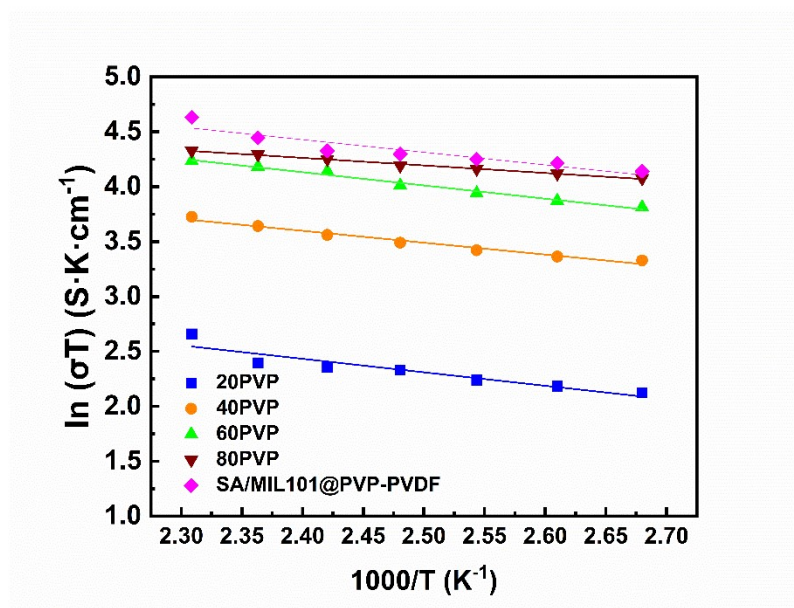

**Figure S10** Arrhenius plot of PA-doped SA/MIL101@PVP-PVDF and different PVP-PVDF blend nanofiber membranes

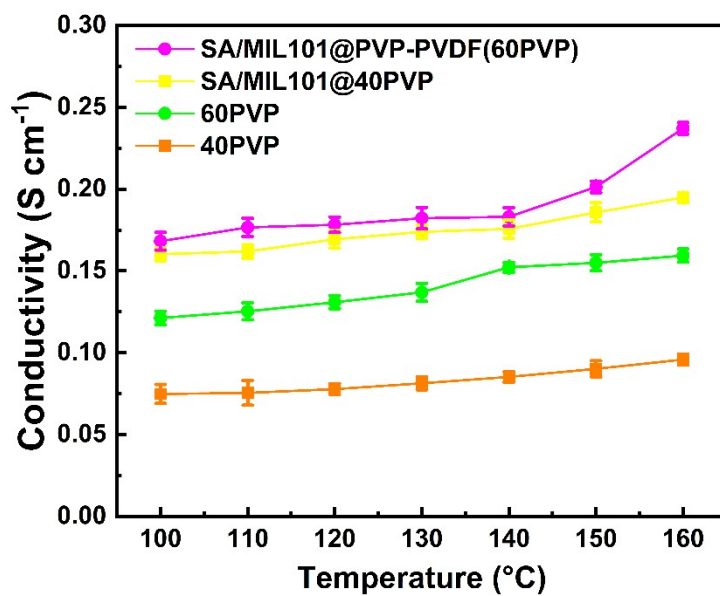

**Figure S11** Proton conductivities of SA/MIL101@40PVP compared with 40PVP, 60PVP and SA/MIL101@PVP-PVDF(60PVP)
